# Supplementary material for: Synovial Fluid from Patients with Osteoarthritis Shows Different Inflammatory Features Depending on the Presence of Calcium Pyrophosphate Crystals
Source: MDPI journal article supplement (doi:10.3390/ijms25010393), 2023-12-27
Supplement: s1 [file s1]

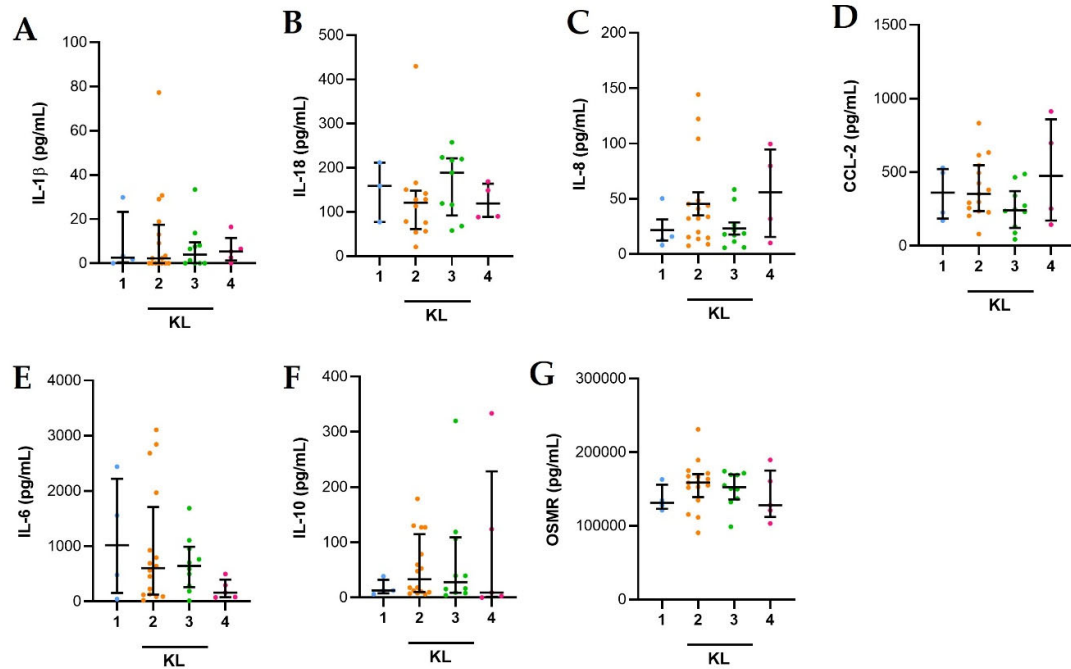

**Supplementary Figure S1.** Association between KL values and cytokine-chemokine in SFs from OA patients. (A) IL 1 $\beta$ , (B) IL-18, (C) IL-8, (D) CCL-2, (E) IL-6, (F) IL-10 and (G) OSMR levels was performed in 35 SFs from OA patients as described in Materials and Methods. Data are shown as the median (IQR). p calculated according to the Kruskal-Wallis test, Dunn's post hoc test. Abbreviations are as follows: KL, Kellgren and Lawrence classification.
